# Supplementary material
Source: PubMed Central journal article supplement (PMC3281613)
Supplement: supp_M111.307264_jbc.M111.307264-2.pdf [file supp_M111.307264_jbc.M111.307264-2.pdf]

**Supplemental Figure 2. Sequences of N- and C-terminal phosphorylated sequences in AHA2 used to blast the GDG *Saccharomyces cerevisiae* database. Phosphorylated residues are underlined. No hits were found.**

1-MSSLEDIKNET

894-FPEKGSYRELS

926-KGHVESVVKLLK

938-LDIETPSHYTV
