# Supplementary material
Source: PubMed Central journal article supplement (PMC3281613)

**Supplemental Figure 3. Side views of the crystal structure of AHA2 with surface exposed serine, threonine, and tyrosine residues highlighted.** Cytoplasmic domains (A, P and N) are indicated. The cytoplasmic N- and C-terminal domains are not visible in the crystal structure (59). Only part of the membrane bound domain (M) is shown.

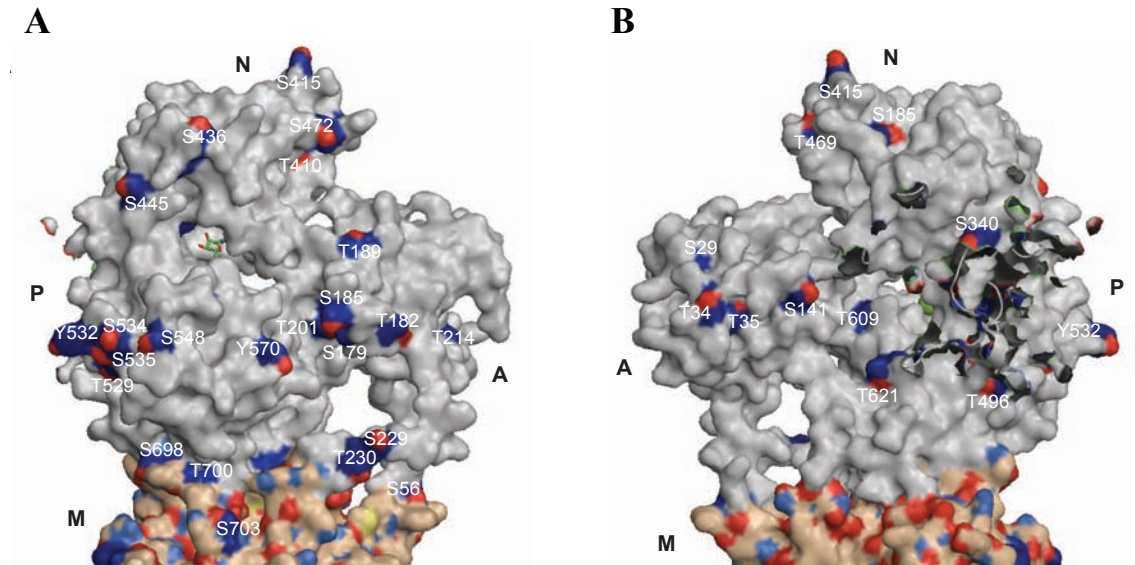

Supplement: supp_M111.307264_jbc.M111.307264-3.pdf [file supp_M111.307264_jbc.M111.307264-3.pdf]
